# Supplementary material for: Dual randomization of oligonucleotides to reduce the bias in ribosome-profiling libraries
Source: PubMed Central journal article supplement — Methods. 2016 Sep 1;107:89–97. doi: 10.1016/j.ymeth.2016.07.011 (PMC5024760; doi:10.1016/j.ymeth.2016.07.011), 2016-09-01

**A**

Linkers ligating to GGTG

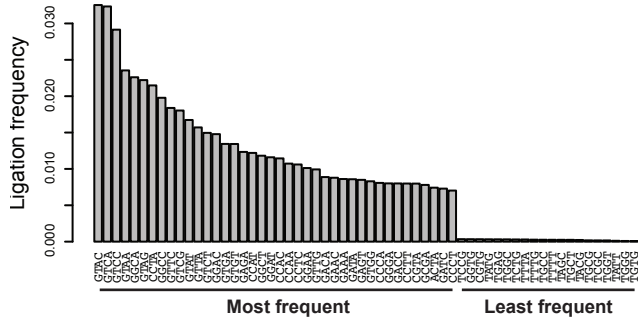**B**

Linkers ligating to CTGC

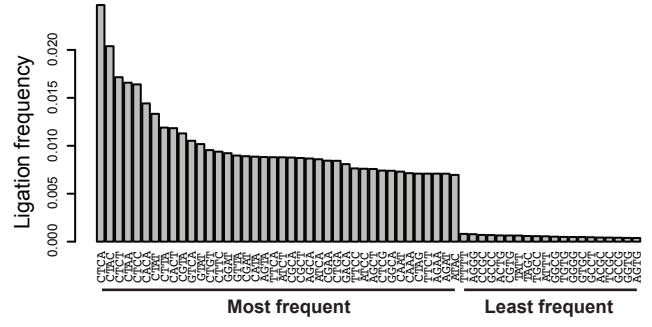**C**

Linkers ligating to TTGC

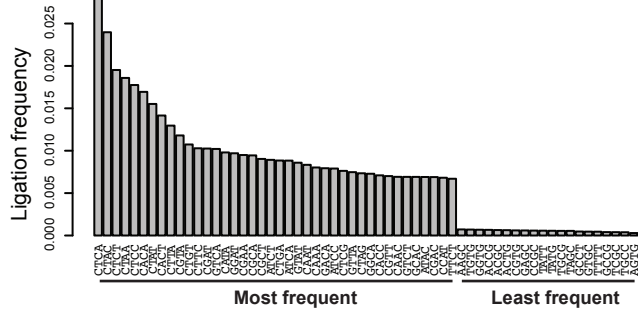**D**

Linkers ligating to GTGC

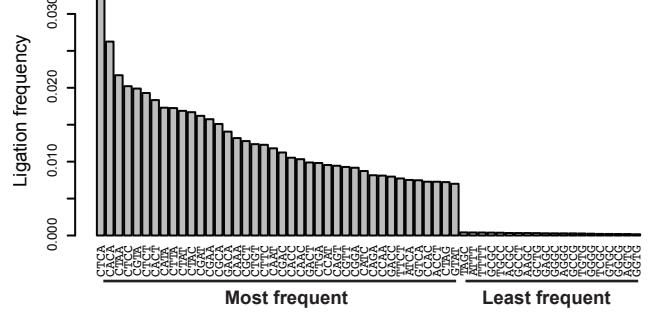

Supplement: mmc3.pdf [file mmc3.pdf]
