# Supplementary figures and images for: Dual randomization of oligonucleotides to reduce the bias in ribosome-profiling libraries
Source: PubMed Central journal article supplement — Methods. 2016 Sep 1;107:89–97. doi: 10.1016/j.ymeth.2016.07.011 (PMC5024760; doi:10.1016/j.ymeth.2016.07.011), 2016-09-01

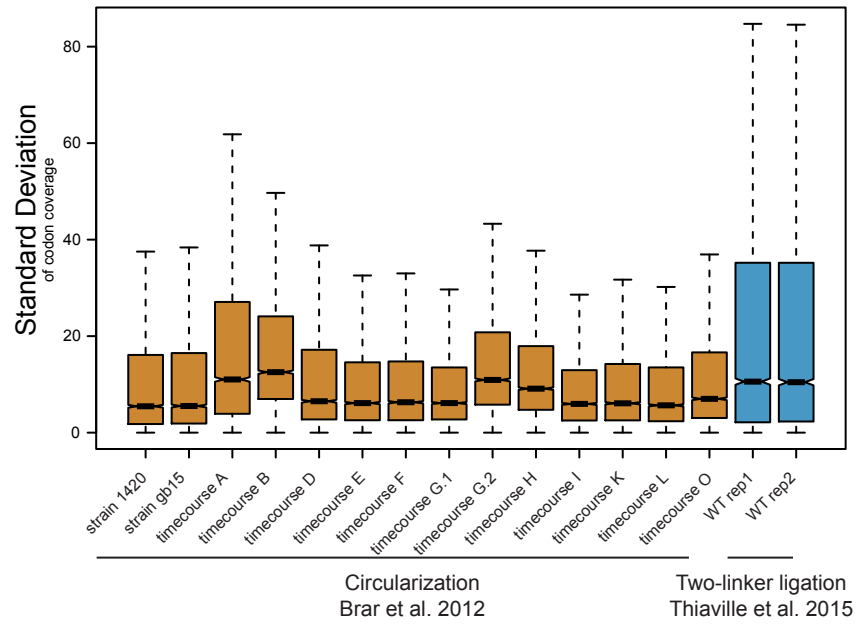

Supplement: mmc1.pdf [file mmc1.pdf]

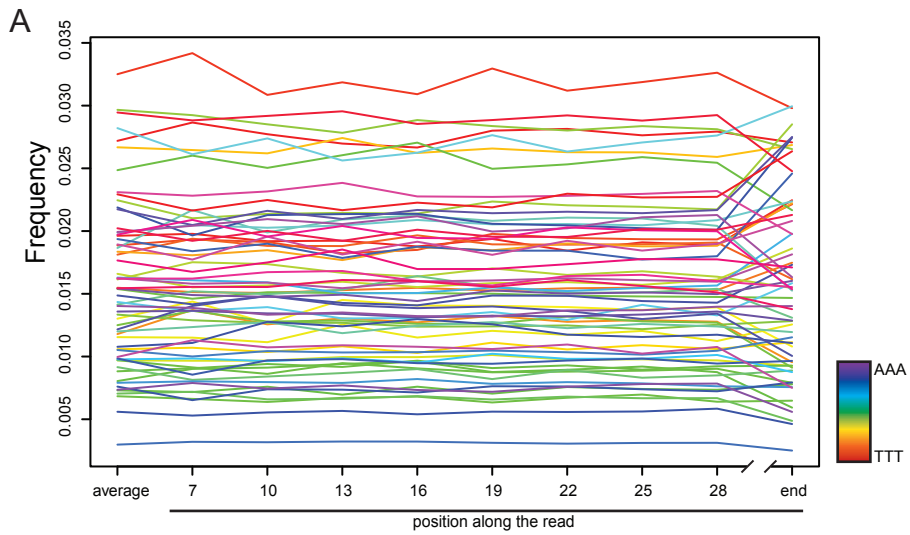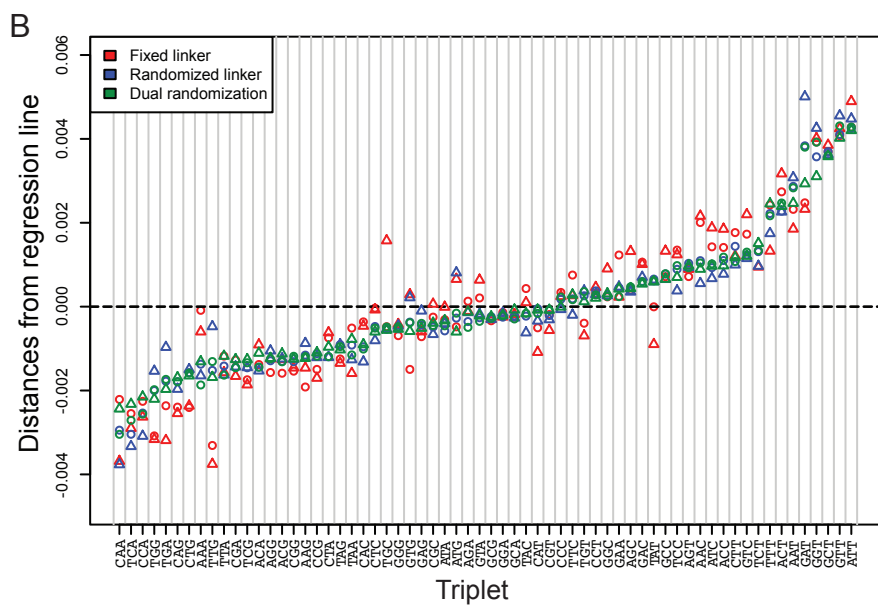

Supplement: mmc2.pdf [file mmc2.pdf]
